# Supplementary material for: Enhancing CO2adsorption of a Zn-phosphonocarboxylate framework by pore space partitions
Source: Royal Society of Chemistry journal article supplement (doi:10.1039/c2cc37174j), 2012-11-05

Electronic Supplementary Information for

Enhancing CO<sub>2</sub> adsorption of a Zn-phosphonocarboxylate  
framework by pore space partitions

Yun Ling, Mingli Deng, Zhenxia Chen, Bing Xia, Xiaofeng Liu, Yongtai Yang,

Yaming Zhou,\* Linhong Weng

Shanghai Key Laboratory of Molecular Catalysis and Innovative Materials,

Department of Chemistry

Fudan University, 220 Handan Road, Shanghai 200433, P. R. China

Fax: +86 21 65643925; Tel: +86 21 65643925

E-mail: [ymzhou@fudan.edu.cn](mailto:ymzhou@fudan.edu.cn)

## 1. Materials and physical measurements

All reagents were purchased from commercial sources and used as received, except for the H<sub>4</sub>pbdc, which was synthesized by the method described previously. IR spectra were measured on a Nicolet 470 FT-IR spectrometer in the range 4000 – 400 cm<sup>-1</sup> with KBr pellets. Absorptions are described as follows: very strong (*vs*), strong (*s*), medium (*m*), weak (*w*), shoulder (*sh*), and broad (*br*). Powder X-ray diffraction (PXRD) patterns were measured using a Bruker D8 powder diffractometer with Cu K $\alpha$  radiation ( $\lambda = 1.5406 \text{ \AA}$ ). The simulated powder patterns for the three iso-structures were calculated using Mercury 1.4. The phase purity of the bulk products were determined by comparison of the simulated and experimental PXRD patterns. Thermogravimetric-Mass analysis (TG-MS) experiments were carried out on the TA Q600 analyzer in the temperature range of 30–500 °C under N<sub>2</sub> flow with a heating rate of 10 °C·min<sup>-1</sup>. SEM images for each as-made sample were obtained on a Philips XL-30 scanning electron microscope. CO<sub>2</sub> (288K and 298 K) and N<sub>2</sub> (298 K) adsorption isotherms were measured on IGA adsorption apparatus. Before each adsorption experiment, all the samples were degassed at 150 °C for 8 hours.

## 2. Synthesis of **ZnPC-2**, **HPYR@ZnPC-2**, **HPIP@ZnPC-2**

**ZnPC-2:** A solution of H<sub>4</sub>pbdc (0.051 g, 0.2 mmol) and triethylamine (0.082 g, 0.8 mmol) in isopropanol (5 ml) was carefully layered onto a solution of Zn(CH<sub>3</sub>COO)<sub>2</sub>·2H<sub>2</sub>O (0.065 g, 0.3 mmol) in deionized water (5 mL) in a teflonlined stainless steel autoclave (15 mL), and then heated at 140 °C for 3 days, followed by cooling at room temperature. Colorless rod-shape crystals of **ZnPC-2** were collected by filtration (Yield: 33 % based on H<sub>4</sub>pbdc).

**HPYR@ZnPC-2 and HPIP@ZnPC-2:** The procedure for preparation of HPYR@ZnPC-2 and HPIP@ZnPC-2 was similar to that of **ZnPC-2** except replacing tea by pyrrolidine for HPYR@ZnPC-2 and by piperidine for HPIP@ZnPC-2. Light yellow rod-like crystals of Hpyr@ZnPC-2 and Hpip@ZnPC-2 were collected by filtration (Yield: 42 % and 44 % respectively). For Hpyr@ZnPC-2, IR (cm<sup>-1</sup>): 3434m, 3065w, 2959w, 2862w, 1614s, 1568m, 1435m, 1380m, 1209w, 1114m, 1011m, 989m, 777m, 729w, 687w, 573m, 455m. For Hpip@ZnPC-2 IR (cm<sup>-1</sup>): 3434m, 3066w, 2863w, 1614s, 1568m, 1435m, 1380m, 1210w, 1114m, 1011m, 989m, 777m, 729w, 687w, 573m, 455m.

### 3. Crystal Structure determination

Suitable single crystals of HPIP@ZnPC-2 were mounted on glass capillaries and data collection were carried out on a Bruker Apex CCD diffractometer with graphite monochromated Mo K $\alpha$  radiation ( $\lambda = 0.71073$  Å) at 293 K. Data reduction was performed with the SAINT and semi-empirical absorption corrections were applied by SADABS program. The structures were solved by direct methods using SHELXS program and refined with SHELXL program. The heavy atoms and other non-hydrogen atoms are directly obtained from difference Fourier map. The final refinements were performed by full-matrix least-squares methods with anisotropic thermal parameters for all non-hydrogen atoms on  $F^2$ . Generally, C-bonded H atoms were placed geometrically and refined as riding modes. The hydrogen atoms on the lattice water and hydrated protons are hardly located from Fourier map, which are theoretically calculated.

**Table S1. Crystallographic data and structure refinement**

|                                                                                                      | <b>ZnPC-2</b>                                                                  | <b>Hpyr@ZnPC-2</b>                                                              | <b>Hpip@ZnPC-2</b>                                                              |
|------------------------------------------------------------------------------------------------------|--------------------------------------------------------------------------------|---------------------------------------------------------------------------------|---------------------------------------------------------------------------------|
| Formula                                                                                              | C <sub>16</sub> H <sub>12</sub> O <sub>16</sub> P <sub>2</sub> Zn <sub>3</sub> | C <sub>20</sub> H <sub>27</sub> NO <sub>19</sub> P <sub>2</sub> Zn <sub>3</sub> | C <sub>21</sub> H <sub>31</sub> NO <sub>20</sub> P <sub>2</sub> Zn <sub>3</sub> |
| F.W.                                                                                                 | 718.31                                                                         | 843.51                                                                          | 875.52                                                                          |
| Space group                                                                                          | I-42d                                                                          | I-42d                                                                           | I-42d                                                                           |
| <i>a</i> (Å)                                                                                         | 18.310(6)                                                                      | 18.450(4)                                                                       | 18.453(7)                                                                       |
| <i>b</i> (Å)                                                                                         | 18.310(6)                                                                      | 18.450(4)                                                                       | 18.453(7)                                                                       |
| <i>c</i> (Å)                                                                                         | 23.222(11)                                                                     | 23.201(7)                                                                       | 23.283(12)                                                                      |
| <i>V</i> (Å <sup>3</sup> )                                                                           | 7785(5)                                                                        | 7898(3)                                                                         | 7928(6)                                                                         |
| <i>Z</i>                                                                                             | 8                                                                              | 8                                                                               | 8                                                                               |
| <i>D<sub>c</sub></i> (g cm <sup>-3</sup> )                                                           | 1.215                                                                          | 1.400                                                                           | 1.442                                                                           |
| <i>μ</i> (mm <sup>-1</sup> )                                                                         | 1.964                                                                          | 1.953                                                                           | 1.950                                                                           |
| <i>F</i> (000)                                                                                       | 2800                                                                           | 3320                                                                            | 3432                                                                            |
| <i>T</i> (K)                                                                                         | 293                                                                            | 293                                                                             | 293                                                                             |
| Total collected                                                                                      | 19410                                                                          | 19669                                                                           | 22955                                                                           |
| Unique data, <i>R</i> (int)                                                                          | 3510, 0.058                                                                    | 4545, 0.165                                                                     | 4567, 0.105                                                                     |
| Observed [ <i>I</i> > 2σ( <i>I</i> )]                                                                | 3105                                                                           | 3312                                                                            | 3048                                                                            |
| GOF on <i>F</i> <sup>2</sup>                                                                         | 1.21                                                                           | 0.96                                                                            | 0.98                                                                            |
| Flack                                                                                                | 0.00(6)                                                                        | 0.00(7)                                                                         | 0.00(7)                                                                         |
| <i>R</i> <sub>1</sub> , <sup>a</sup> <i>wR</i> <sub>2</sub> <sup>b</sup> [ <i>I</i> >2σ( <i>I</i> )] | 0.0409, 0.1374                                                                 | 0.0540, 0.1314                                                                  | 0.0520, 0.1485                                                                  |
| Δρ <sub>max</sub> /Δρ <sub>min</sub> (e Å <sup>-3</sup> )                                            | 0.81, -0.47                                                                    | 0.76, -1.14                                                                     | 1.07, -0.43                                                                     |
| CCDC                                                                                                 | 746203                                                                         | 776925                                                                          | 894708                                                                          |

<sup>a</sup> *R*<sub>1</sub> = Σ||*F*<sub>o</sub>| - |*F*<sub>c</sub>||/Σ|*F*<sub>o</sub>|. <sup>b</sup> *wR*<sub>2</sub> = [Σ*w*(*F*<sub>o</sub><sup>2</sup> - *F*<sub>c</sub><sup>2</sup>)<sup>2</sup>/Σ*w*(*F*<sub>o</sub><sup>2</sup>)<sup>2</sup>]<sup>1/2</sup>

**Table S2.** The occupied volume, free volume, surface area per unit cell calculated by a probe atom (radii 1.84 Å) and the theoretical surface area calculated by the formula of  $\text{Å}^2/(\text{Dc} \times \text{V})$ , V = cell volume, and Dc = density of the sample.

|                    | Occupied<br>Volume (Å <sup>3</sup> ) | Free<br>Volume (Å <sup>3</sup> ) | Surface<br>Area (Å <sup>2</sup> ) | Surface area<br>(m <sup>2</sup> /g) |
|--------------------|--------------------------------------|----------------------------------|-----------------------------------|-------------------------------------|
| <b>ZnPC-2</b>      | 7058.01                              | 758.79                           | 1429.28                           | 1497                                |
| <b>HPYR@ZnPC-2</b> | 7427.49                              | 470.19                           | 909.17                            | 822                                 |
| <b>HPIP@ZnPC-2</b> | 7499.69                              | 428.48                           | 811.91                            | 709                                 |
| <b>MOF-5</b>       | 10515.95                             | 6721.54                          | 3669.25                           | 2739                                |

**Table S3.** Adsorption and selectivity of CO<sub>2</sub> over N<sub>2</sub> for some amino-modified MOFs

| MOF            | Strategy <sup>a</sup> | CO <sub>2</sub><br>(mmol/g) <sup>b</sup> | Selectivity <sup>c</sup> | Q <sub>st</sub> <sup>d</sup><br>(kJ/mol) | Ref  |
|----------------|-----------------------|------------------------------------------|--------------------------|------------------------------------------|------|
| bioMOF-1       |                       | 0.32                                     |                          | 35                                       | 16a  |
| TMA-bioMOF-1   | PE                    | 0.46                                     |                          | 40                                       | 16a  |
| TEA-bioMOF-1   |                       | 0.53                                     |                          | 35                                       | 16a  |
| TBA-bio-MOF-1  |                       | 0.47                                     |                          | 60                                       | 16a  |
| Cu(BTtri)      |                       | 0.65                                     | 19                       | 20                                       | 16b  |
| en-Cu(BTtri)   | PE                    | 0.52                                     | 44                       | 90                                       | 16b  |
| mmen-Cu(BTtri) |                       | 2.1                                      | 165                      | 96                                       | 16b  |
| ZnPC-2         |                       | 0.26                                     | 9                        | 40                                       | Here |
| Hpyr@ZnPC-2    | PSP                   | 0.71                                     | 27                       | 36                                       | Here |
| Hpip@ZnPC-2    |                       | 1.13                                     | 94                       | 32                                       | Here |

[a] PE: Post-Exchange with amines, PSP: pore space partition; [b] CO<sub>2</sub> uptake amount at 0.15 bar and 298K, [c] selectivity is calculated by the method mentioned in ref. 2e; [d] Q<sub>st</sub> at zero coverage.

**Figure S1** (a) 6-connected  $\text{Zn}_3$ -SBU and tritopic ligand of pbdc in the rutile-type framework; (b-d) the 3D framework of ZnPC-2, HPYR@ZnPC-2, HPIP@ZnPC-2 respectively (up: the (3,6)-connected topology, below: the related 3D structure. Symmetry code used to generate the pyrrolidine and piperidine: i: 0.5-x, y, 1.75-z; ii: x, 1.5-y, 1.25-z )

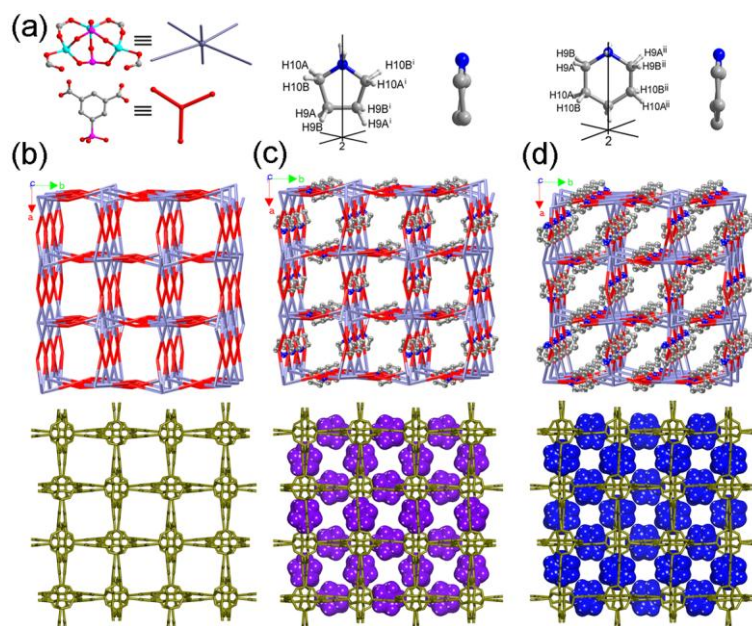



**Figure S2.** the PXRD data of ZnPC-2 (a), HPYR@ZnPC-2 (b) and HPIP@ZnPC-2 (c) showing well agreement with simulated one for as-made, activated and after adsorbed samples (red: the simulated data; black: as-made sample; blue: activated sample; dark yellow: after adsorption )

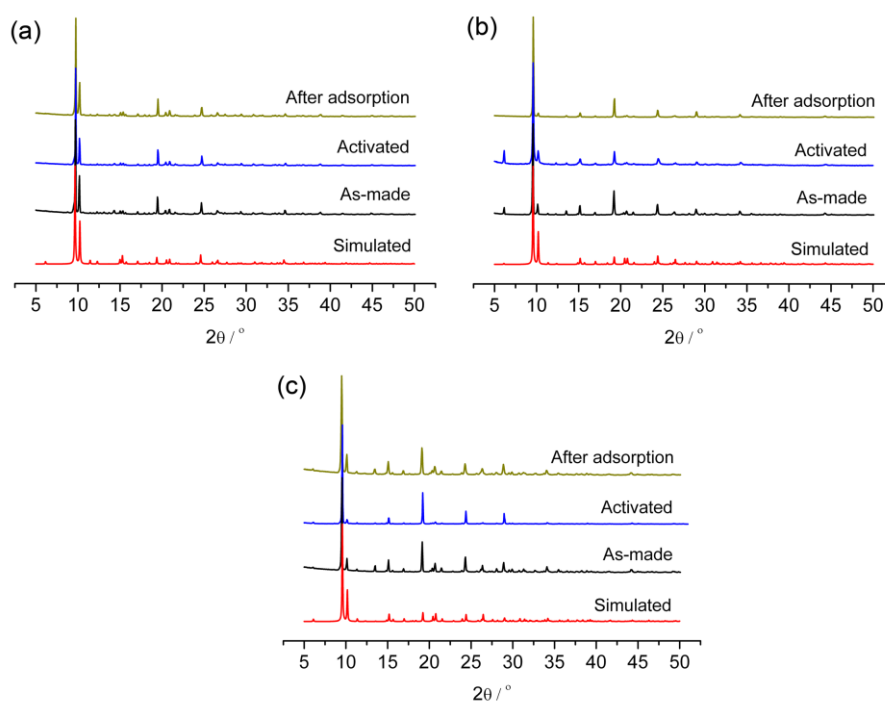

**Figure S3.** The SEM images for ZnPC-2 (a), HPYR@ZnPC-2 (b) and HPIP@ZnPC-2 showing the pure rod-like morphology.

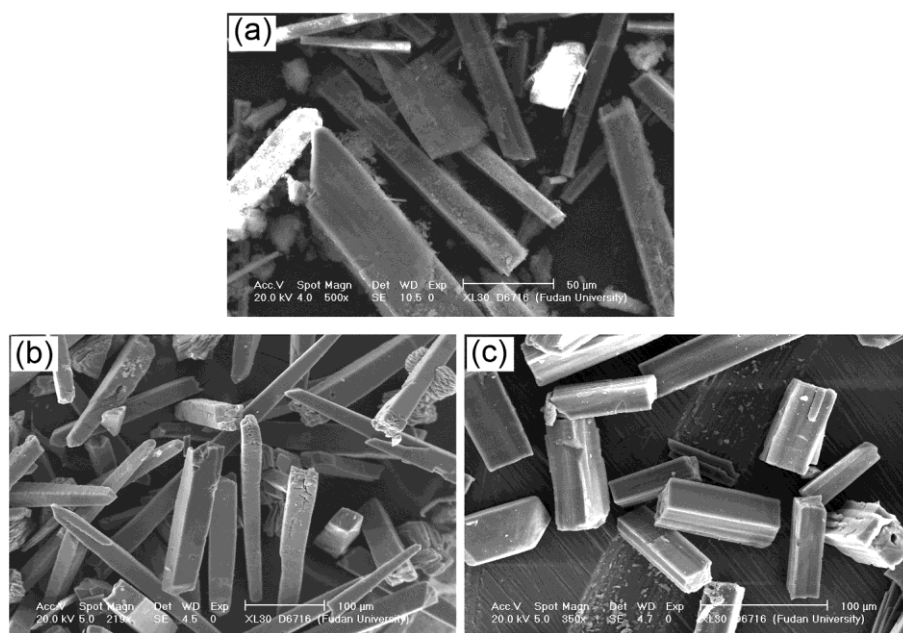

**Figure S4.** the isostructures of ZnPC-2 (a), HPYR@ZnPC-2 (b) and HPIP@ZnPC-2 (c) in packing structures showing along *c* and *a* axes (the pore size along *c* axis is slightly decreased after embedded HPYR or HPIP, which are strong bonded to host framework by hydrogen bonding interactions)

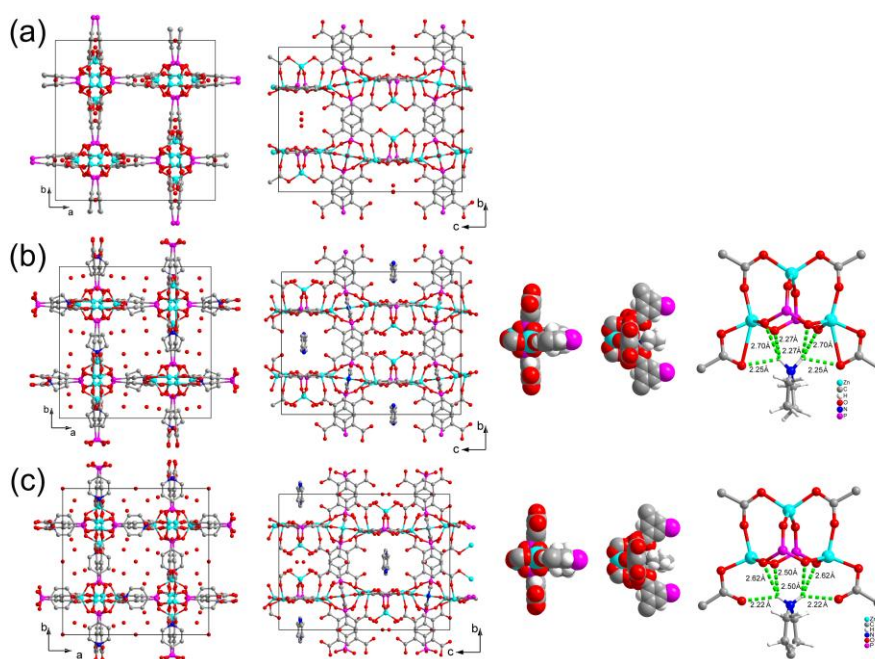

**Figure S5.** The size of the entrance for ZnPC-2 (a), HPYR@ZnPC-2 (b) and HPIP@ZnPC-2 are calculated to be ca. 6.8, 5.3 and 4.8 Å respectively, based on the Connolly surface (Connolly radius sets to be 1.4 Å and vdW scale factor sets to be 1.)

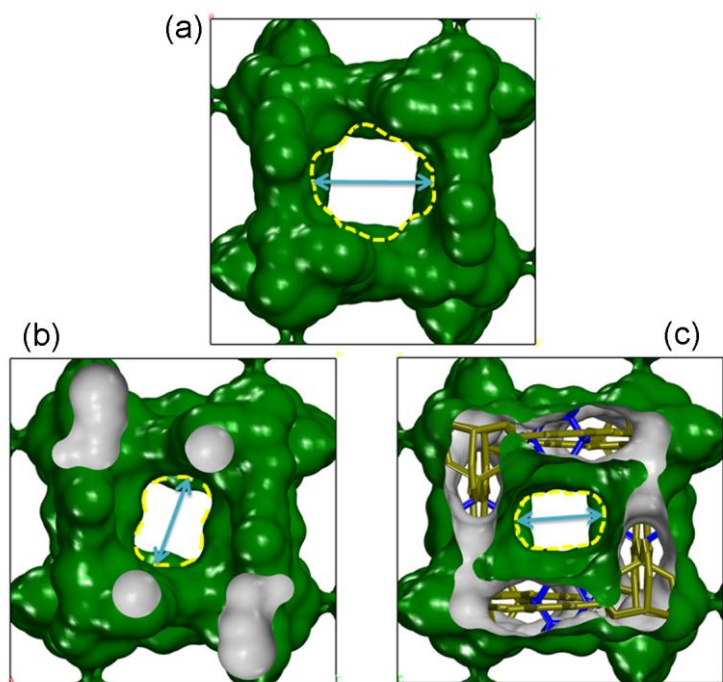

**Figure S6.** The TG-MS data of Hpyr@ZnPC-2 (a) and Hpip@ZnPC-2 (b) showing the release of template agent after decomposition of the host framework (the samples are washed with water (10 mL  $\times$ 3) and acetone (10 mL  $\times$ 3), then degased at room temperature)

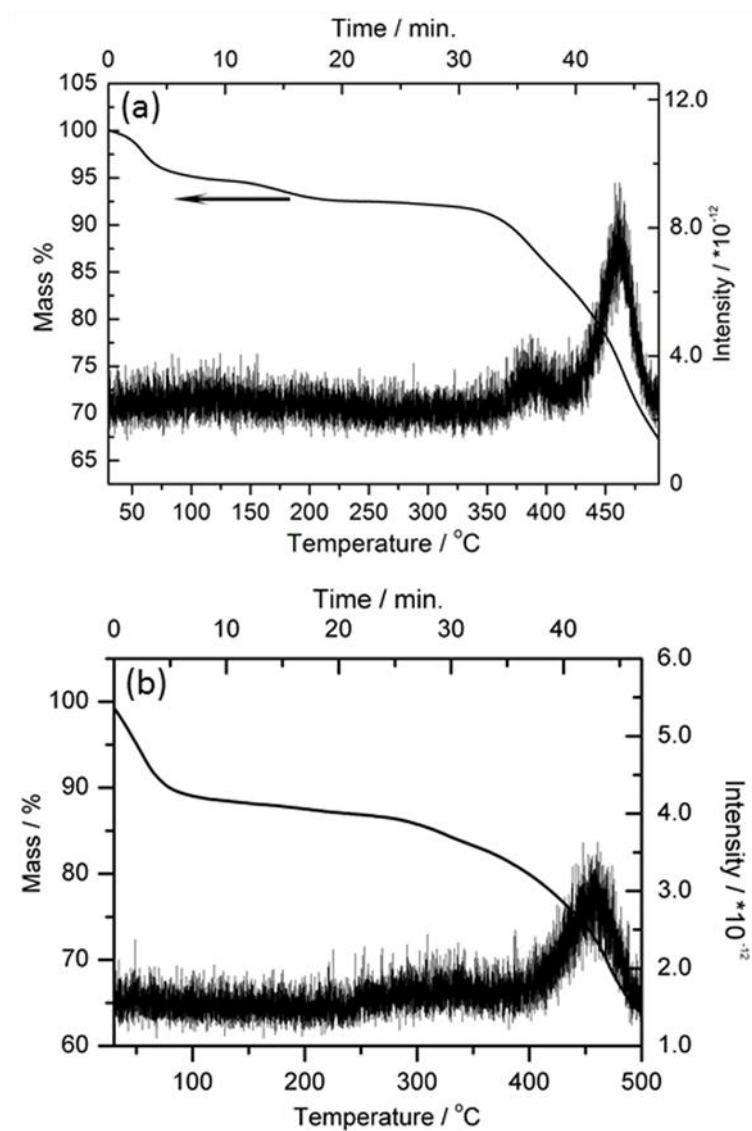

**Figure S7.** The CO<sub>2</sub> adsorption and desorption data of ZnPC-2 and HPIP@ZnPC-2

recorded on ASAP 2020 at 300 K.

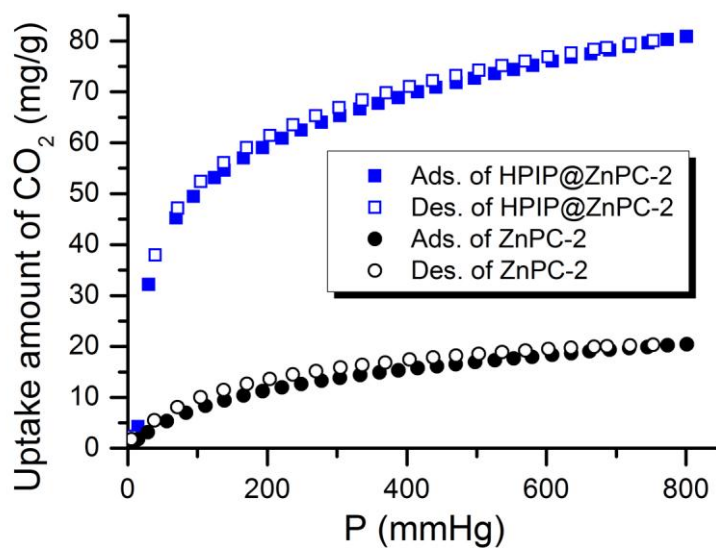

**Figure S8.** The adsorption data of CO<sub>2</sub> at 298 and 288 K which were fitted by Virial Method and the calculated  $Q_{st}$  (a) for ZnPC-2; (b) for HPYR@ZnPC-2; (c) for HPIP@ZnPC-2.

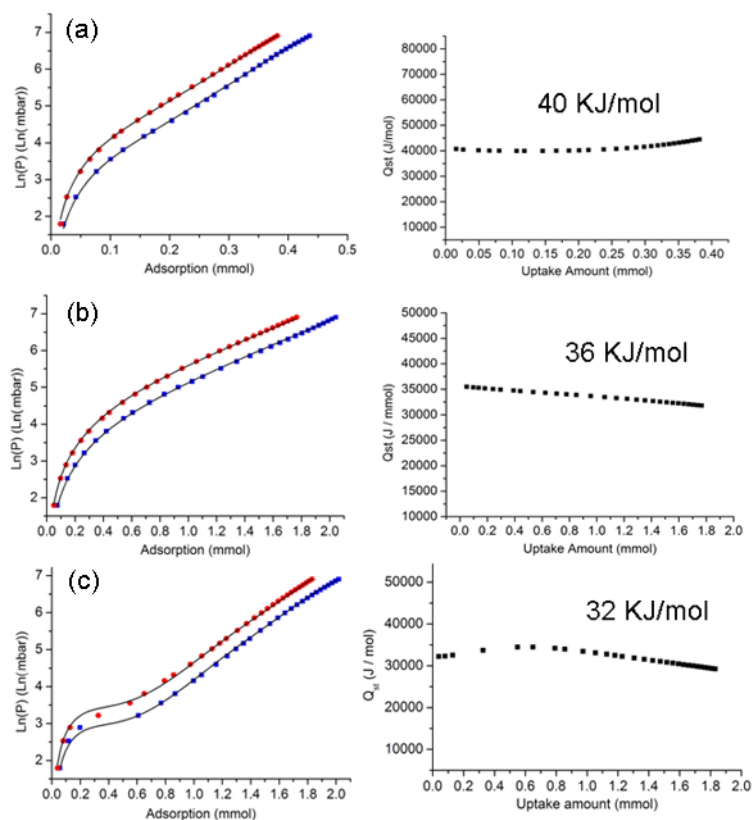

$$\text{Eq. (1): } \ln(P) = \ln(x) + \frac{1}{T} \sum_{i=0}^m a_i x^i + \sum_{i=0}^n b_i x^i \quad (1)$$

$$\text{Eq. (2): } Q_{st} = -R \sum_{i=0}^m a_i x^i \quad (2)$$

**Figure S9.** The selective adsorption ability of Hpip@ZnPC-2 for the mixed gas of CO<sub>2</sub> and N<sub>2</sub> at 32 °C measure on a thermogravimetric apparatus (The gas cycling experiment was carried out by using a flow of CO<sub>2</sub> and N<sub>2</sub> (1: 4 in V/V) and followed by a flow of pure N<sub>2</sub> gas at atmospheric pressure, the sample was activated using the thermogravimetric apparatus at 150 °C for 3h flow and then cooling down under N<sub>2</sub>)

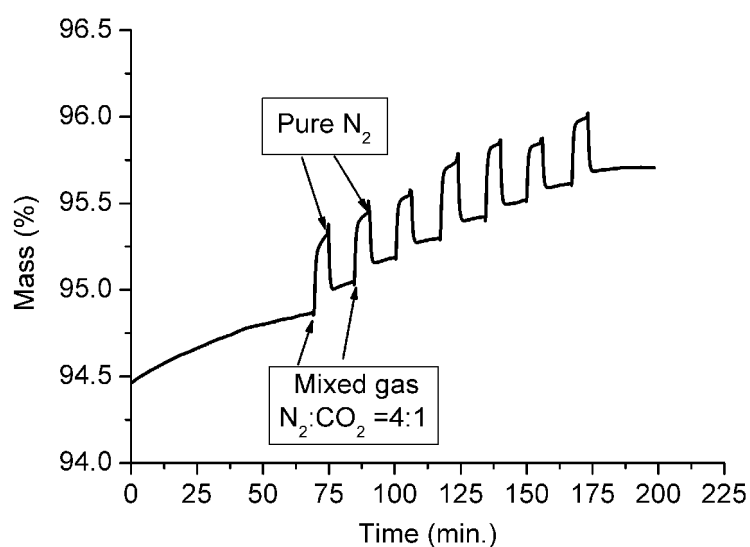

Supplement: c2cc37174j.pdf [file c2cc37174j.pdf]
